# Supplementary material for: Dietary methionine supplementation during the estrous cycle improves follicular development and estrogen synthesis in rats
Source: Royal Society of Chemistry journal article supplement (doi:10.1039/d3fo04106a), 2023-12-18

**Dietary methionine supplementation during estrus cycle improves follicular  
development and estrogen synthesis in rats**

Yang et al.

Online supplementary material

**Supplemental Figures/Tables**

**Table S1: The contents of amino acids in the diets during estrus cycle of rat (Analyzed,  
%)**

| Items      | Control<br>0.40% | Met %       |             |             |             |
|------------|------------------|-------------|-------------|-------------|-------------|
|            |                  | 0.60%       | 0.90%       | 1.07%       | 1.37%       |
| Asp        | 1.42             | 1.41        | 1.43        | 1.42        | 1.43        |
| Thr        | 0.65             | 0.66        | 0.65        | 0.65        | 0.66        |
| Ser        | 0.76             | 0.74        | 0.77        | 0.77        | 0.75        |
| Glu        | 3.03             | 3.01        | 3.05        | 2.97        | 3.03        |
| Pro        | 1.31             | 1.48        | 1.39        | 1.45        | 1.36        |
| Gly        | 0.79             | 0.78        | 0.80        | 0.77        | 0.81        |
| Ala        | 0.89             | 0.86        | 0.88        | 0.89        | 0.89        |
| Cys        | 0.33             | 0.31        | 0.31        | 0.32        | 0.33        |
| Val        | 0.81             | 0.81        | 0.81        | 0.81        | 0.81        |
| <b>Met</b> | <b>0.40</b>      | <b>0.60</b> | <b>0.90</b> | <b>1.07</b> | <b>1.37</b> |
| Ile        | 0.71             | 0.72        | 0.71        | 0.73        | 0.71        |
| Leu        | 1.42             | 1.41        | 1.45        | 1.40        | 1.42        |
| Tyr        | 0.57             | 0.58        | 0.57        | 0.58        | 0.57        |
| Phe        | 0.61             | 0.59        | 0.60        | 0.58        | 0.61        |
| His        | 0.55             | 0.53        | 0.55        | 0.52        | 0.55        |
| Lys        | 0.81             | 0.79        | 0.82        | 0.80        | 0.81        |
| Arg        | 1.03             | 1.05        | 1.05        | 1.06        | 1.03        |
| Trp        | 0.21             | 0.20        | 0.21        | 0.20        | 0.21        |

**Table S2: The contents of amino acids in the diets during estrus cycle of rat (Analyzed, %)**

| Items      | Control     | 0.83% Met   |
|------------|-------------|-------------|
| Asp        | 1.43        | 1.41        |
| Thr        | 0.65        | 0.64        |
| Ser        | 0.77        | 0.74        |
| Glu        | 3.07        | 2.97        |
| Pro        | 1.27        | 1.50        |
| Gly        | 0.80        | 0.77        |
| Ala        | 0.89        | 0.87        |
| Cys        | 0.33        | 0.30        |
| Val        | 0.81        | 0.81        |
| <b>Met</b> | <b>0.39</b> | <b>0.85</b> |
| Ile        | 0.71        | 0.71        |
| Leu        | 1.42        | 1.39        |
| Tyr        | 0.57        | 0.57        |
| Phe        | 0.61        | 0.54        |
| His        | 0.55        | 0.50        |
| Lys        | 0.81        | 0.80        |
| Arg        | 1.03        | 1.06        |
| Trp        | 0.21        | 0.20        |

**Table S3: PCR primers used for gene expression analysis**

| Gene                            | Forward primer           | Reverse primer          |
|---------------------------------|--------------------------|-------------------------|
| <i>SNAT1</i>                    | TTCTTCACAGTCCGGTCCTC     | GTCACCCCTACGACTCCAAA    |
| <i>SNAT2</i>                    | CTGTCCCCGTCGTCATTTTC     | GAACCCGAAGATGTCCCTGA    |
| <i>SNAT4</i>                    | ACCCTGGAACGACCTCTTTT     | AAACGCCTTCTCTCCCAACT    |
| <i>LAT1</i>                     | GAGACCTCAGAAAAGCCCCT     | GGTGAGCTAGGTGGGAAGTT    |
| <i>LAT2</i>                     | GAGACCTCAGAAAAGCCCCT     | GGTGAGCTAGGTGGGAAGTT    |
| <i>BOAT</i>                     | GGCTCCATCCCTCTGCTAAT     | TCCTCATAGTCAGGGTCCCA    |
| <i>ASCI</i>                     | CTTGGTGTTCTGGGCATTCC     | AAACCACGAAACACAGCTCC    |
| <i>TATU</i>                     | AACTGCTACATACTACTCTG     | CGGAACCAACTGAACTCTT     |
| <i>MAT2a</i>                    | CTGGGGTCATTGTCAGGGAT     | CCCTTTCCTCAGAGCTTGA     |
| <i>MAT2b</i>                    | CACTAGAGGAGGCTGTGGTC     | AGTGGCACCCGTAATGAGAA    |
| <i>DNMT1</i>                    | AGCCCAGAGTATGCACCAAT     | ATCATCGTCCTTAGCGTCGT    |
| <i>DNMT3a</i>                   | AGAAGCCGCTGTTACCTCTT     | GCTGAAACCCTTTGCACAGA    |
| <i>DNMT3b</i>                   | AGGGGCATCACTGGAAATGA     | AGTGAGGAAGCAGTGGAGAC    |
| <i>CBS</i>                      | ACACAGTGCCGACAAAATCC     | CAGCGTCTTCAATCATCCGG    |
| <i>CTH</i>                      | TTCAGGAATGGGATGGCAGT     | GAAGCTCAGCCAGACTCTCA    |
| <i>LHCGT</i>                    | GCTCGGAGGATGGCTCTTTT     | AGCACAGATGACGACGAAGG    |
| <i>FSHR</i>                     | CATTCTTGGGCACGGGATCT     | GGTGAGCACAAACCTCAGTT    |
| <i>ESR1</i>                     | TCGCTACTGTGCTGTGTGTA     | GCCTTTCATCATGCCCACTT    |
| <i>ESR2</i>                     | TGAGCACCTTGAGTCCAGAG     | AGTCCCACCATTAGCACCTC    |
| <i>CYP11A</i>                   | AAAAGGTCTTTGCCTGCGCT     | TTGCCCAGCTTCTCCCTGTAAAT |
| <i>CYP19A</i>                   | TCCCCCTGGACGAAAGTTCT     | TGTCAGGTCTCCACGTCTCT    |
| <i>STAR</i>                     | CACACTTTGGGGAGATGCCT     | GAACTTCCAATGGCGTGCAG    |
| <i>HSD3B</i>                    | CCAAGGAGGAATTCTCTAAGCTGC | CGACGCAGGCCTCCAATA      |
| <i>GDF9</i>                     | CAGATATTGCCTCCACCCCC     | ATACATGGCTGCTGGACCAC    |
| <i>BMP15</i>                    | AGAGCCACTGTGGTTTACCG     | AGAAGGCTTTGAGGAACCCG    |
| <i><math>\beta</math>-ACTIN</i> | AGCTGAGAGGGAAATCGTGC     | GGAAGGCTGGAAAAGAGCCT    |

**Figure S1: Feeding 0.83% methionine diet have no effect on serum contents of SAM and GSH.**

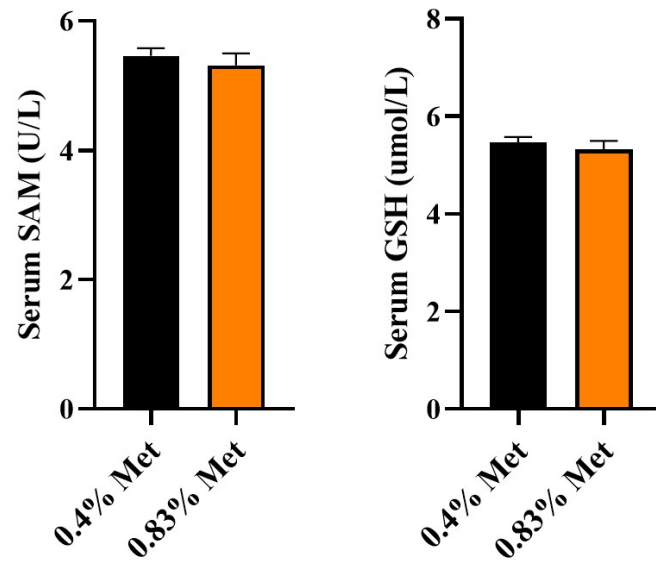

Supplement: d3fo04106a2.pdf [file d3fo04106a2.pdf]
